# Supplementary material for: A predictive model for secondary RNA structure using graph theory and a neural network
Source: PubMed Central journal article supplement (PMC3026369; doi:10.1186/1471-2105-11-s6-s21), 2010-10-07
Supplement: 1471-2105-11-S6-S21-S1.pdf [file 1471-2105-11-S6-S21-S1.pdf]

Table A - The complete table of vertex identifications from all tree merges

| RAG<br>Trees<br>to be<br>Merged | DATA FROM<br>THE 1 <sup>st</sup> TREE |               |                            | DATA FROM<br>THE 2 <sup>nd</sup> TREE |               |                            | RESULTS      |               |                 |
|---------------------------------|---------------------------------------|---------------|----------------------------|---------------------------------------|---------------|----------------------------|--------------|---------------|-----------------|
|                                 | Tree<br>Color                         | Vert.<br>Type | <i>deg</i><br>( <i>v</i> ) | Tree<br>Color                         | Vert.<br>Type | <i>deg</i><br>( <i>v</i> ) | RAG<br>Graph | Tree<br>Color | Total<br>Graphs |
| 2.1+2.1                         | Red                                   | Leaf          | 1                          | Red                                   | Leaf          | 1                          | 3.1          | Red           | 4               |
| 2.1+3.1                         | Red                                   | Leaf          | 1                          | Red                                   | Leaf          | 1                          | 4.1          | Red           | 4               |
| 2.1+3.1                         | Red                                   | Leaf          | 1                          | Red                                   | Support       | 2                          | 4.2          | Blue          | 2               |
| 2.1+4.1                         | Red                                   | Leaf          | 1                          | Red                                   | Leaf          | 1                          | 5.1          | Red           | 4               |
| 2.1+4.1                         | Red                                   | Leaf          | 1                          | Red                                   | Support       | 2                          | 5.2          | Red           | 4               |
| 2.1+4.2                         | Red                                   | Leaf          | 1                          | Blue                                  | Leaf          | 1                          | 5.2          | Red           | 6               |
| 2.1+4.2                         | Red                                   | Leaf          | 1                          | Blue                                  | Support       | 3                          | 5.3          | Red           | 2               |
| 2.1+5.1                         | Red                                   | Leaf          | 1                          | Red                                   | Leaf          | 1                          | 6.1          | Blue          | 4               |
| 2.1+5.1                         | Red                                   | Leaf          | 1                          | Red                                   | Support       | 2                          | 6.2          | Red           | 4               |
| 2.1+5.1                         | Red                                   | Leaf          | 1                          | Red                                   | Internal      | 2                          | 6.3          | Blue          | 2               |
| 2.1+5.2                         | Red                                   | Leaf          | 1                          | Red                                   | Leaf          | 1                          | 6.2          | Red           | 2               |
| 2.1+5.2                         | Red                                   | Leaf          | 1                          | Red                                   | Leaf          | 1                          | 6.3          | Blue          | 4               |
| 2.1+5.2                         | Red                                   | Leaf          | 1                          | Red                                   | Support       | 2                          | 6.4          | Blue          | 2               |
| 2.1+5.2                         | Red                                   | Leaf          | 1                          | Red                                   | Support       | 3                          | 6.5          | Black         | 2               |
| 2.1+5.3                         | Red                                   | Leaf          | 1                          | Red                                   | Leaf          | 1                          | 6.5          | Black         | 8               |
| 2.1+5.3                         | Red                                   | Leaf          | 1                          | Red                                   | Support       | 4                          | 6.6          | Red           | 2               |
| 2.1+6.1                         | Red                                   | Leaf          | 1                          | Blue                                  | Leaf          | 1                          | 7.1          | Red           | 4               |
| 2.1+6.1                         | Red                                   | Leaf          | 1                          | Blue                                  | Support       | 2                          | 7.2          | Red           | 4               |
| 2.1+6.1                         | Red                                   | Leaf          | 1                          | Blue                                  | Internal      | 2                          | 7.3          | Red           | 4               |
| 2.1+6.2                         | Red                                   | Leaf          | 1                          | Red                                   | Leaf          | 1                          | 7.2          | Red           | 2               |
| 2.1+6.2                         | Red                                   | Leaf          | 1                          | Red                                   | Leaf          | 1                          | 7.3          | Red           | 4               |
| 2.1+6.2                         | Red                                   | Leaf          | 1                          | Red                                   | Support       | 2                          | 7.4          | Blue          | 2               |
| 2.1+6.2                         | Red                                   | Leaf          | 1                          | Red                                   | Support       | 3                          | 7.5          | Blue          | 2               |
| 2.1+6.2                         | Red                                   | Leaf          | 1                          | Red                                   | Internal      | 2                          | 7.6          | Red           | 2               |
| 2.1+6.3                         | Red                                   | Leaf          | 1                          | Blue                                  | Leaf          | 1                          | 7.3          | Red           | 4               |
| 2.1+6.3                         | Red                                   | Leaf          | 1                          | Blue                                  | Support       | 2                          | 7.6          | Red           | 4               |
| 2.1+6.3                         | Red                                   | Leaf          | 1                          | Blue                                  | Support       | 3                          | 7.7          | Blue          | 2               |
| 2.1+6.3                         | Red                                   | Leaf          | 1                          | Blue                                  | Leaf          | 1                          | 7.8          | Blue          | 2               |
| 2.1+6.4                         | Red                                   | Leaf          | 1                          | Blue                                  | Leaf          | 1                          | 7.6          | Red           | 8               |
| 2.1+6.4                         | Red                                   | Leaf          | 1                          | Blue                                  | Support       | 3                          | 7.9          | Black         | 4               |
| 2.1+6.5                         | Red                                   | Leaf          | 1                          | Black                                 | Support       | 4                          | 7.10         | Black         | 2               |
| 2.1+6.5                         | Red                                   | Leaf          | 1                          | Black                                 | Leaf          | 1                          | 7.5          | Blue          | 2               |
| 2.1+6.5                         | Red                                   | Leaf          | 1                          | Black                                 | Leaf          | 1                          | 7.7          | Blue          | 6               |
| 2.1+6.5                         | Red                                   | Leaf          | 1                          | Black                                 | Support       | 2                          | 7.9          | Black         | 2               |
| 2.1+6.6                         | Red                                   | Leaf          | 1                          | Red                                   | Leaf          | 1                          | 7.10         | Black         | 10              |
| 2.1+6.6                         | Red                                   | Leaf          | 1                          | Red                                   | Support       | 5                          | 7.11         | Black         | 2               |
| 2.1+7.1                         | Red                                   | Leaf          | 1                          | Red                                   | Leaf          | 1                          | 8.1          | Blue          | 4               |
| 2.1+7.1                         | Red                                   | Leaf          | 1                          | Red                                   | Support       | 2                          | 8.2          | Blue          | 4               |

| RAG<br>Trees<br>to be<br>Merged | DATA FROM<br>THE 1 <sup>st</sup> TREE |               |                            | DATA FROM<br>THE 2 <sup>nd</sup> TREE |               |                            | RESULTS      |               |                 |
|---------------------------------|---------------------------------------|---------------|----------------------------|---------------------------------------|---------------|----------------------------|--------------|---------------|-----------------|
|                                 | Tree<br>Color                         | Vert.<br>Type | <i>deg</i><br>( <i>v</i> ) | Tree<br>Color                         | Vert.<br>Type | <i>deg</i><br>( <i>v</i> ) | RAG<br>Graph | Tree<br>Color | Total<br>Graphs |
| 2.1+7.1                         | Red                                   | Leaf          | 1                          | Red                                   | Internal      | 2                          | 8.3          | Red           | 4               |
| 2.1+7.1                         | Red                                   | Leaf          | 1                          | Red                                   | Internal      | 2                          | 8.5          | Red           | 2               |
| 2.1+7.10                        | Red                                   | Leaf          | 1                          | Black                                 | Leaf          | 1                          | 8.14         | Black         | 2               |
| 2.1+7.10                        | Red                                   | Leaf          | 1                          | Black                                 | Support       | 2                          | 8.19         | Black         | 2               |
| 2.1+7.10                        | Red                                   | Leaf          | 1                          | Black                                 | Leaf          | 1                          | 8.21         | Black         | 8               |
| 2.1+7.10                        | Red                                   | Leaf          | 1                          | Black                                 | Support       | 5                          | 8.22         | Black         | 2               |
| 2.1+7.11                        | Red                                   | Leaf          | 1                          | Black                                 | Leaf          | 1                          | 8.22         | Black         | 12              |
| 2.1+7.11                        | Red                                   | Leaf          | 1                          | Black                                 | Support       | 6                          | 8.23         | Black         | 2               |
| 2.1+7.2                         | Red                                   | Leaf          | 1                          | Red                                   | Leaf          | 1                          | 8.2          | Blue          | 2               |
| 2.1+7.2                         | Red                                   | Leaf          | 1                          | Red                                   | Leaf          | 1                          | 8.3          | Red           | 4               |
| 2.1+7.2                         | Red                                   | Leaf          | 1                          | Red                                   | Support       | 2                          | 8.4          | Blue          | 2               |
| 2.1+7.2                         | Red                                   | Leaf          | 1                          | Red                                   | Support       | 3                          | 8.6          | Blue          | 2               |
| 2.1+7.2                         | Red                                   | Leaf          | 1                          | Red                                   | Internal      | 2                          | 8.7          | Red           | 2               |
| 2.1+7.2                         | Red                                   | Leaf          | 1                          | Red                                   | Internal      | 2                          | 8.8          | Blue          | 2               |
| 2.1+7.3                         | Red                                   | Leaf          | 1                          | Red                                   | Leaf          | 1                          | 8.10         | Red           | 2               |
| 2.1+7.3                         | Red                                   | Leaf          | 1                          | Red                                   | Internal      | 2                          | 8.11         | Red           | 2               |
| 2.1+7.3                         | Red                                   | Leaf          | 1                          | Red                                   | Internal      | 3                          | 8.12         | Blue          | 2               |
| 2.1+7.3                         | Red                                   | Leaf          | 1                          | Red                                   | Leaf          | 1                          | 8.3          | Red           | 2               |
| 2.1+7.3                         | Red                                   | Leaf          | 1                          | Red                                   | Leaf          | 1                          | 8.5          | Red           | 2               |
| 2.1+7.3                         | Red                                   | Leaf          | 1                          | Red                                   | Support       | 2                          | 8.7          | Red           | 2               |
| 2.1+7.3                         | Red                                   | Leaf          | 1                          | Red                                   | Support       | 2                          | 8.8          | Blue          | 2               |
| 2.1+7.4                         | Red                                   | Leaf          | 1                          | Blue                                  | Internal      | 2                          | 8.13         | Blue          | 2               |
| 2.1+7.4                         | Red                                   | Leaf          | 1                          | Blue                                  | Support       | 3                          | 8.9          | Black         | 4               |
| 2.1+7.5                         | Red                                   | Leaf          | 1                          | Blue                                  | Leaf          | 1                          | 8.12         | Blue          | 6               |
| 2.1+7.5                         | Red                                   | Leaf          | 1                          | Blue                                  | Support       | 4                          | 8.14         | Black         | 2               |
| 2.1+7.5                         | Red                                   | Leaf          | 1                          | Blue                                  | Internal      | 2                          | 8.15         | Red           | 2               |
| 2.1+7.5                         | Red                                   | Leaf          | 1                          | Blue                                  | Leaf          | 1                          | 8.6          | Blue          | 2               |
| 2.1+7.5                         | Red                                   | Leaf          | 1                          | Blue                                  | Support       | 2                          | 8.9          | Black         | 2               |
| 2.1+7.6                         | Red                                   | Leaf          | 1                          | Red                                   | Leaf          | 1                          | 8.11         | Red           | 4               |
| 2.1+7.6                         | Red                                   | Leaf          | 1                          | Red                                   | Support       | 2                          | 8.13         | Blue          | 2               |
| 2.1+7.6                         | Red                                   | Leaf          | 1                          | Red                                   | Support       | 3                          | 8.15         | Red           | 2               |
| 2.1+7.6                         | Red                                   | Leaf          | 1                          | Red                                   | Leaf          | 1                          | 8.16         | Blue          | 2               |
| 2.1+7.6                         | Red                                   | Leaf          | 1                          | Red                                   | Internal      | 3                          | 8.17         | Black         | 2               |
| 2.1+7.6                         | Red                                   | Leaf          | 1                          | Red                                   | Leaf          | 1                          | 8.8          | Blue          | 2               |
| 2.1+7.7                         | Red                                   | Leaf          | 1                          | Blue                                  | Leaf          | 1                          | 8.12         | Blue          | 4               |
| 2.1+7.7                         | Red                                   | Leaf          | 1                          | Blue                                  | Support       | 2                          | 8.17         | Black         | 4               |
| 2.1+7.7                         | Red                                   | Leaf          | 1                          | Blue                                  | Leaf          | 1                          | 8.20         | Red           | 4               |
| 2.1+7.7                         | Red                                   | Leaf          | 1                          | Blue                                  | Internal      | 4                          | 8.21         | Black         | 2               |
| 2.1+7.8                         | Red                                   | Leaf          | 1                          | Blue                                  | Leaf          | 1                          | 8.10         | Red           | 6               |
| 2.1+7.8                         | Red                                   | Leaf          | 1                          | Blue                                  | Support       | 2                          | 8.16         | Blue          | 6               |
| 2.1+7.8                         | Red                                   | Leaf          | 1                          | Blue                                  | Internal      | 3                          | 8.20         | Red           | 2               |
| 2.1+7.9                         | Red                                   | Leaf          | 1                          | Black                                 | Leaf          | 1                          | 8.15         | Red           | 4               |

| RAG<br>Trees<br>to be<br>Merged | DATA FROM<br>THE 1 <sup>st</sup> TREE |               |                            | DATA FROM<br>THE 2 <sup>nd</sup> TREE |               |                            | RESULTS      |               |                 |
|---------------------------------|---------------------------------------|---------------|----------------------------|---------------------------------------|---------------|----------------------------|--------------|---------------|-----------------|
|                                 | Tree<br>Color                         | Vert.<br>Type | <i>deg</i><br>( <i>v</i> ) | Tree<br>Color                         | Vert.<br>Type | <i>deg</i><br>( <i>v</i> ) | RAG<br>Graph | Tree<br>Color | Total<br>Graphs |
| 2.1+7.9                         | Red                                   | Leaf          | 1                          | Black                                 | Leaf          | 1                          | 8.17         | Black         | 6               |
| 2.1+7.9                         | Red                                   | Leaf          | 1                          | Black                                 | Support       | 3                          | 8.18         | Black         | 2               |
| 2.1+7.9                         | Red                                   | Leaf          | 1                          | Black                                 | Support       | 4                          | 8.19         | Black         | 2               |
| 2.1+8.1                         | Red                                   | Leaf          | 1                          | Blue                                  | Leaf          | 1                          | 9.1          | Unknown       | 4               |
| 2.1+8.1                         | Red                                   | Leaf          | 1                          | Blue                                  | Support       | 2                          | 9.2          | Unknown       | 4               |
| 2.1+8.1                         | Red                                   | Leaf          | 1                          | Blue                                  | Internal      | 2                          | 9.4          | Unknown       | 4               |
| 2.1+8.1                         | Red                                   | Leaf          | 1                          | Blue                                  | Internal      | 2                          | 9.6          | Red           | 4               |
| 2.1+8.10                        | Red                                   | Leaf          | 1                          | Red                                   | Leaf          | 1                          | 9.11         | Red           | 2               |
| 2.1+8.10                        | Red                                   | Leaf          | 1                          | Red                                   | Support       | 2                          | 9.17         | Unknown       | 2               |
| 2.1+8.10                        | Red                                   | Leaf          | 1                          | Red                                   | Leaf          | 1                          | 9.18         | Unknown       | 4               |
| 2.1+8.10                        | Red                                   | Leaf          | 1                          | Red                                   | Support       | 2                          | 9.26         | Unknown       | 4               |
| 2.1+8.10                        | Red                                   | Leaf          | 1                          | Red                                   | Internal      | 2                          | 9.27         | Red           | 2               |
| 2.1+8.10                        | Red                                   | Leaf          | 1                          | Red                                   | Internal      | 3                          | 9.29         | Unknown       | 2               |
| 2.1+8.11                        | Red                                   | Leaf          | 1                          | Red                                   | Leaf          | 1                          | 9.14         | Unknown       | 4               |
| 2.1+8.11                        | Red                                   | Leaf          | 1                          | Red                                   | Support       | 2                          | 9.24         | Unknown       | 4               |
| 2.1+8.11                        | Red                                   | Leaf          | 1                          | Red                                   | Leaf          | 1                          | 9.27         | Red           | 4               |
| 2.1+8.11                        | Red                                   | Leaf          | 1                          | Red                                   | Internal      | 3                          | 9.30         | Unknown       | 4               |
| 2.1+8.12                        | Red                                   | Leaf          | 1                          | Blue                                  | Leaf          | 1                          | 9.19         | Unknown       | 2               |
| 2.1+8.12                        | Red                                   | Leaf          | 1                          | Blue                                  | Leaf          | 1                          | 9.21         | Unknown       | 2               |
| 2.1+8.12                        | Red                                   | Leaf          | 1                          | Blue                                  | Support       | 2                          | 9.22         | Unknown       | 2               |
| 2.1+8.12                        | Red                                   | Leaf          | 1                          | Blue                                  | Leaf          | 1                          | 9.29         | Unknown       | 4               |
| 2.1+8.12                        | Red                                   | Leaf          | 1                          | Blue                                  | Internal      | 2                          | 9.30         | Unknown       | 2               |
| 2.1+8.12                        | Red                                   | Leaf          | 1                          | Blue                                  | Internal      | 4                          | 9.31         | Unknown       | 2               |
| 2.1+8.12                        | Red                                   | Leaf          | 1                          | Blue                                  | Support       | 2                          | 9.44         | Unknown       | 2               |
| 2.1+8.13                        | Red                                   | Leaf          | 1                          | Blue                                  | Leaf          | 1                          | 9.24         | Unknown       | 8               |
| 2.1+8.13                        | Red                                   | Leaf          | 1                          | Blue                                  | Support       | 3                          | 9.28         | Unknown       | 4               |
| 2.1+8.13                        | Red                                   | Leaf          | 1                          | Blue                                  | Leaf          | 1                          | 9.33         | Unknown       | 2               |
| 2.1+8.13                        | Red                                   | Leaf          | 1                          | Blue                                  | Support       | 3                          | 9.35         | Unknown       | 2               |
| 2.1+8.14                        | Red                                   | Leaf          | 1                          | Black                                 | Leaf          | 1                          | 9.15         | Unknown       | 2               |
| 2.1+8.14                        | Red                                   | Leaf          | 1                          | Black                                 | Support       | 2                          | 9.25         | Unknown       | 2               |
| 2.1+8.14                        | Red                                   | Leaf          | 1                          | Black                                 | Leaf          | 1                          | 9.31         | Unknown       | 8               |
| 2.1+8.14                        | Red                                   | Leaf          | 1                          | Black                                 | Support       | 2                          | 9.32         | Unknown       | 2               |
| 2.1+8.14                        | Red                                   | Leaf          | 1                          | Black                                 | Internal      | 2                          | 9.36         | Unknown       | 2               |
| 2.1+8.15                        | Red                                   | Leaf          | 1                          | Red                                   | Leaf          | 1                          | 9.20         | Unknown       | 2               |
| 2.1+8.15                        | Red                                   | Leaf          | 1                          | Red                                   | Support       | 2                          | 9.28         | Unknown       | 2               |
| 2.1+8.15                        | Red                                   | Leaf          | 1                          | Red                                   | Leaf          | 1                          | 9.30         | Unknown       | 6               |
| 2.1+8.15                        | Red                                   | Leaf          | 1                          | Red                                   | Leaf          | 1                          | 9.34         | Unknown       | 2               |
| 2.1+8.15                        | Red                                   | Leaf          | 1                          | Red                                   | Support       | 4                          | 9.36         | Unknown       | 2               |
| 2.1+8.15                        | Red                                   | Leaf          | 1                          | Red                                   | Internal      | 3                          | 9.37         | Unknown       | 2               |
| 2.1+8.16                        | Red                                   | Leaf          | 1                          | Blue                                  | Leaf          | 1                          | 9.26         | Unknown       | 4               |
| 2.1+8.16                        | Red                                   | Leaf          | 1                          | Blue                                  | Leaf          | 1                          | 9.27         | Red           | 4               |

| RAG<br>Trees<br>to be<br>Merged | DATA FROM<br>THE 1 <sup>st</sup> TREE |               |                            | DATA FROM<br>THE 2 <sup>nd</sup> TREE |               |                            | RESULTS      |               |                 |
|---------------------------------|---------------------------------------|---------------|----------------------------|---------------------------------------|---------------|----------------------------|--------------|---------------|-----------------|
|                                 | Tree<br>Color                         | Vert.<br>Type | <i>deg</i><br>( <i>v</i> ) | Tree<br>Color                         | Vert.<br>Type | <i>deg</i><br>( <i>v</i> ) | RAG<br>Graph | Tree<br>Color | Total<br>Graphs |
| 2.1+8.16                        | Red                                   | Leaf          | 1                          | Blue                                  | Support       | 2                          | 9.33         | Unknown       | 4               |
| 2.1+8.16                        | Red                                   | Leaf          | 1                          | Blue                                  | Support       | 3                          | 9.34         | Unknown       | 2               |
| 2.1+8.16                        | Red                                   | Leaf          | 1                          | Blue                                  | Internal      | 3                          | 9.38         | Unknown       | 2               |
| 2.1+8.17                        | Red                                   | Leaf          | 1                          | Black                                 | Leaf          | 1                          | 9.30         | Unknown       | 4               |
| 2.1+8.17                        | Red                                   | Leaf          | 1                          | Black                                 | Support       | 2                          | 9.35         | Unknown       | 2               |
| 2.1+8.17                        | Red                                   | Leaf          | 1                          | Black                                 | Support       | 3                          | 9.37         | Unknown       | 2               |
| 2.1+8.17                        | Red                                   | Leaf          | 1                          | Black                                 | Leaf          | 1                          | 9.38         | Unknown       | 4               |
| 2.1+8.17                        | Red                                   | Leaf          | 1                          | Black                                 | Internal      | 4                          | 9.39         | Unknown       | 2               |
| 2.1+8.17                        | Red                                   | Leaf          | 1                          | Black                                 | Leaf          | 1                          | 9.44         | Unknown       | 2               |
| 2.1+8.18                        | Red                                   | Leaf          | 1                          | Black                                 | Leaf          | 1                          | 9.37         | Unknown       | 12              |
| 2.1+8.18                        | Red                                   | Leaf          | 1                          | Black                                 | Support       | 4                          | 9.40         | Unknown       | 4               |
| 2.1+8.19                        | Red                                   | Leaf          | 1                          | Black                                 | Leaf          | 1                          | 9.36         | Unknown       | 4               |
| 2.1+8.19                        | Red                                   | Leaf          | 1                          | Black                                 | Leaf          | 1                          | 9.39         | Unknown       | 8               |
| 2.1+8.19                        | Red                                   | Leaf          | 1                          | Black                                 | Support       | 3                          | 9.40         | Unknown       | 2               |
| 2.1+8.19                        | Red                                   | Leaf          | 1                          | Black                                 | Support       | 5                          | 9.41         | Unknown       | 2               |
| 2.1+8.2                         | Red                                   | Leaf          | 1                          | Blue                                  | Internal      | 2                          | 9.10         | Unknown       | 2               |
| 2.1+8.2                         | Red                                   | Leaf          | 1                          | Blue                                  | Leaf          | 1                          | 9.2          | Unknown       | 2               |
| 2.1+8.2                         | Red                                   | Leaf          | 1                          | Blue                                  | Support       | 2                          | 9.3          | Unknown       | 2               |
| 2.1+8.2                         | Red                                   | Leaf          | 1                          | Blue                                  | Leaf          | 1                          | 9.4          | Unknown       | 4               |
| 2.1+8.2                         | Red                                   | Leaf          | 1                          | Blue                                  | Support       | 3                          | 9.5          | Unknown       | 2               |
| 2.1+8.2                         | Red                                   | Leaf          | 1                          | Blue                                  | Internal      | 2                          | 9.7          | Unknown       | 2               |
| 2.1+8.2                         | Red                                   | Leaf          | 1                          | Blue                                  | Internal      | 2                          | 9.8          | Unknown       | 2               |
| 2.1+8.20                        | Red                                   | Leaf          | 1                          | Red                                   | Leaf          | 1                          | 9.29         | Unknown       | 6               |
| 2.1+8.20                        | Red                                   | Leaf          | 1                          | Red                                   | Support       | 2                          | 9.38         | Unknown       | 6               |
| 2.1+8.20                        | Red                                   | Leaf          | 1                          | Red                                   | Leaf          | 1                          | 9.42         | Unknown       | 2               |
| 2.1+8.20                        | Red                                   | Leaf          | 1                          | Red                                   | Internal      | 4                          | 9.43         | Unknown       | 2               |
| 2.1+8.21                        | Red                                   | Leaf          | 1                          | Black                                 | Leaf          | 1                          | 9.31         | Unknown       | 4               |
| 2.1+8.21                        | Red                                   | Leaf          | 1                          | Black                                 | Support       | 2                          | 9.39         | Unknown       | 4               |
| 2.1+8.21                        | Red                                   | Leaf          | 1                          | Black                                 | Leaf          | 1                          | 9.43         | Unknown       | 6               |
| 2.1+8.21                        | Red                                   | Leaf          | 1                          | Black                                 | Support       | 5                          | 9.45         | Unknown       | 2               |
| 2.1+8.22                        | Red                                   | Leaf          | 1                          | Black                                 | Leaf          | 1                          | 9.32         | Unknown       | 2               |
| 2.1+8.22                        | Red                                   | Leaf          | 1                          | Black                                 | Support       | 2                          | 9.41         | Unknown       | 2               |
| 2.1+8.22                        | Red                                   | Leaf          | 1                          | Black                                 | Leaf          | 1                          | 9.45         | Unknown       | 10              |
| 2.1+8.22                        | Red                                   | Leaf          | 1                          | Black                                 | Internal      | 5                          | 9.46         | Unknown       | 2               |
| 2.1+8.23                        | Red                                   | Leaf          | 1                          | Black                                 | Leaf          | 1                          | 9.46         | Unknown       | 14              |
| 2.1+8.23                        | Red                                   | Leaf          | 1                          | Black                                 | Internal      | 7                          | 9.47         | Unknown       | 2               |
| 2.1+8.3                         | Red                                   | Leaf          | 1                          | Red                                   | Leaf          | 1                          | 9.11         | Red           | 2               |
| 2.1+8.3                         | Red                                   | Leaf          | 1                          | Red                                   | Internal      | 2                          | 9.12         | Unknown       | 2               |
| 2.1+8.3                         | Red                                   | Leaf          | 1                          | Red                                   | Internal      | 2                          | 9.14         | Unknown       | 2               |
| 2.1+8.3                         | Red                                   | Leaf          | 1                          | Red                                   | Support       | 3                          | 9.21         | Unknown       | 2               |
| 2.1+8.3                         | Red                                   | Leaf          | 1                          | Red                                   | Leaf          | 1                          | 9.4          | Unknown       | 2               |

| RAG<br>Trees<br>to be<br>Merged | DATA FROM<br>THE 1 <sup>st</sup> TREE |               |                            | DATA FROM<br>THE 2 <sup>nd</sup> TREE |               |                            | RESULTS      |               |                 |
|---------------------------------|---------------------------------------|---------------|----------------------------|---------------------------------------|---------------|----------------------------|--------------|---------------|-----------------|
|                                 | Tree<br>Color                         | Vert.<br>Type | <i>deg</i><br>( <i>v</i> ) | Tree<br>Color                         | Vert.<br>Type | <i>deg</i><br>( <i>v</i> ) | RAG<br>Graph | Tree<br>Color | Total<br>Graphs |
| 2.1+8.3                         | Red                                   | Leaf          | 1                          | Red                                   | Leaf          | 1                          | 9.6          | Red           | 2               |
| 2.1+8.3                         | Red                                   | Leaf          | 1                          | Red                                   | Support       | 2                          | 9.7          | Unknown       | 2               |
| 2.1+8.3                         | Red                                   | Leaf          | 1                          | Red                                   | Support       | 2                          | 9.8          | Unknown       | 2               |
| 2.1+8.4                         | Red                                   | Leaf          | 1                          | Blue                                  | Internal      | 2                          | 9.13         | Red           | 4               |
| 2.1+8.4                         | Red                                   | Leaf          | 1                          | Blue                                  | Leaf          | 1                          | 9.7          | Unknown       | 8               |
| 2.1+8.4                         | Red                                   | Leaf          | 1                          | Blue                                  | Support       | 3                          | 9.9          | Unknown       | 4               |
| 2.1+8.5                         | Red                                   | Leaf          | 1                          | Red                                   | Support       | 2                          | 9.10         | Unknown       | 4               |
| 2.1+8.5                         | Red                                   | Leaf          | 1                          | Red                                   | Internal      | 2                          | 9.14         | Unknown       | 4               |
| 2.1+8.5                         | Red                                   | Leaf          | 1                          | Red                                   | Leaf          | 1                          | 9.18         | Unknown       | 2               |
| 2.1+8.5                         | Red                                   | Leaf          | 1                          | Red                                   | Support       | 3                          | 9.19         | Unknown       | 2               |
| 2.1+8.5                         | Red                                   | Leaf          | 1                          | Red                                   | Leaf          | 1                          | 9.6          | Red           | 4               |
| 2.1+8.6                         | Red                                   | Leaf          | 1                          | Blue                                  | Support       | 4                          | 9.15         | Unknown       | 2               |
| 2.1+8.6                         | Red                                   | Leaf          | 1                          | Blue                                  | Internal      | 2                          | 9.16         | Unknown       | 2               |
| 2.1+8.6                         | Red                                   | Leaf          | 1                          | Blue                                  | Internal      | 2                          | 9.20         | Unknown       | 2               |
| 2.1+8.6                         | Red                                   | Leaf          | 1                          | Blue                                  | Leaf          | 1                          | 9.21         | Unknown       | 6               |
| 2.1+8.6                         | Red                                   | Leaf          | 1                          | Blue                                  | Leaf          | 1                          | 9.5          | Unknown       | 2               |
| 2.1+8.6                         | Red                                   | Leaf          | 1                          | Blue                                  | Support       | 2                          | 9.9          | Unknown       | 2               |
| 2.1+8.7                         | Red                                   | Leaf          | 1                          | Red                                   | Leaf          | 1                          | 9.10         | Unknown       | 2               |
| 2.1+8.7                         | Red                                   | Leaf          | 1                          | Red                                   | Leaf          | 1                          | 9.12         | Unknown       | 4               |
| 2.1+8.7                         | Red                                   | Leaf          | 1                          | Red                                   | Support       | 2                          | 9.13         | Red           | 2               |
| 2.1+8.7                         | Red                                   | Leaf          | 1                          | Red                                   | Support       | 3                          | 9.16         | Unknown       | 2               |
| 2.1+8.7                         | Red                                   | Leaf          | 1                          | Red                                   | Leaf          | 1                          | 9.17         | Unknown       | 2               |
| 2.1+8.7                         | Red                                   | Leaf          | 1                          | Red                                   | Internal      | 3                          | 9.22         | Unknown       | 2               |
| 2.1+8.7                         | Red                                   | Leaf          | 1                          | Red                                   | Internal      | 2                          | 9.24         | Unknown       | 2               |
| 2.1+8.8                         | Red                                   | Leaf          | 1                          | Blue                                  | Support       | 2                          | 9.13         | Red           | 2               |
| 2.1+8.8                         | Red                                   | Leaf          | 1                          | Blue                                  | Leaf          | 1                          | 9.14         | Unknown       | 4               |
| 2.1+8.8                         | Red                                   | Leaf          | 1                          | Blue                                  | Support       | 3                          | 9.20         | Unknown       | 2               |
| 2.1+8.8                         | Red                                   | Leaf          | 1                          | Blue                                  | Internal      | 2                          | 9.24         | Unknown       | 2               |
| 2.1+8.8                         | Red                                   | Leaf          | 1                          | Blue                                  | Leaf          | 1                          | 9.26         | Unknown       | 2               |
| 2.1+8.8                         | Red                                   | Leaf          | 1                          | Blue                                  | Internal      | 3                          | 9.44         | Unknown       | 2               |
| 2.1+8.8                         | Red                                   | Leaf          | 1                          | Blue                                  | Leaf          | 1                          | 9.8          | Unknown       | 2               |
| 2.1+8.9                         | Red                                   | Leaf          | 1                          | Black                                 | Leaf          | 1                          | 9.16         | Unknown       | 4               |
| 2.1+8.9                         | Red                                   | Leaf          | 1                          | Black                                 | Leaf          | 1                          | 9.22         | Unknown       | 6               |
| 2.1+8.9                         | Red                                   | Leaf          | 1                          | Black                                 | Support       | 3                          | 9.23         | Unknown       | 2               |
| 2.1+8.9                         | Red                                   | Leaf          | 1                          | Black                                 | Support       | 4                          | 9.25         | Unknown       | 2               |
| 2.1+8.9                         | Red                                   | Leaf          | 1                          | Black                                 | Internal      | 2                          | 9.28         | Unknown       | 2               |
| 3.1+3.1                         | Red                                   | Leaf          | 1                          | Red                                   | Leaf          | 1                          | 5.1          | Red           | 4               |
| 3.1+3.1                         | Red                                   | Leaf          | 1                          | Red                                   | Support       | 2                          | 5.2          | Red           | 4               |
| 3.1+3.1                         | Red                                   | Support       | 2                          | Red                                   | Support       | 2                          | 5.3          | Red           | 1               |
| 3.1+4.1                         | Red                                   | Leaf          | 1                          | Red                                   | Leaf          | 1                          | 6.1          | Blue          | 4               |
| 3.1+4.1                         | Red                                   | Support       | 2                          | Red                                   | Leaf          | 1                          | 6.2          | Red           | 2               |

| RAG<br>Trees<br>to be<br>Merged | DATA FROM<br>THE 1 <sup>st</sup> TREE |               |                            | DATA FROM<br>THE 2 <sup>nd</sup> TREE |               |                            | RESULTS      |               |                 |
|---------------------------------|---------------------------------------|---------------|----------------------------|---------------------------------------|---------------|----------------------------|--------------|---------------|-----------------|
|                                 | Tree<br>Color                         | Vert.<br>Type | <i>deg</i><br>( <i>v</i> ) | Tree<br>Color                         | Vert.<br>Type | <i>deg</i><br>( <i>v</i> ) | RAG<br>Graph | Tree<br>Color | Total<br>Graphs |
| 3.1+4.1                         | Red                                   | Leaf          | 1                          | Red                                   | Support       | 2                          | 6.3          | Blue          | 4               |
| 3.1+4.1                         | Red                                   | Support       | 2                          | Red                                   | Support       | 2                          | 6.5          | Black         | 2               |
| 3.1+4.2                         | Red                                   | Leaf          | 1                          | Blue                                  | Leaf          | 1                          | 6.2          | Red           | 6               |
| 3.1+4.2                         | Red                                   | Support       | 2                          | Blue                                  | Leaf          | 1                          | 6.4          | Blue          | 3               |
| 3.1+4.2                         | Red                                   | Leaf          | 1                          | Blue                                  | Support       | 3                          | 6.5          | Black         | 2               |
| 3.1+4.2                         | Red                                   | Support       | 2                          | Blue                                  | Support       | 3                          | 6.6          | Red           | 1               |
| 3.1+5.1                         | Red                                   | Leaf          | 1                          | Red                                   | Leaf          | 1                          | 7.1          | Red           | 4               |
| 3.1+5.1                         | Red                                   | Support       | 2                          | Red                                   | Leaf          | 1                          | 7.2          | Red           | 2               |
| 3.1+5.1                         | Red                                   | Leaf          | 1                          | Red                                   | Support       | 2                          | 7.3          | Red           | 4               |
| 3.1+5.1                         | Red                                   | Support       | 2                          | Red                                   | Support       | 2                          | 7.5          | Blue          | 2               |
| 3.1+5.1                         | Red                                   | Support       | 2                          | Red                                   | Internal      | 2                          | 7.7          | Blue          | 1               |
| 3.1+5.1                         | Red                                   | Leaf          | 1                          | Red                                   | Internal      | 2                          | 7.8          | Blue          | 2               |
| 3.1+5.2                         | Red                                   | Support       | 2                          | Red                                   | Support       | 3                          | 7.10         | Black         | 1               |
| 3.1+5.2                         | Red                                   | Leaf          | 1                          | Red                                   | Leaf          | 1                          | 7.2          | Red           | 2               |
| 3.1+5.2                         | Red                                   | Leaf          | 1                          | Red                                   | Leaf          | 1                          | 7.3          | Red           | 4               |
| 3.1+5.2                         | Red                                   | Support       | 2                          | Red                                   | Leaf          | 1                          | 7.4          | Blue          | 1               |
| 3.1+5.2                         | Red                                   | Leaf          | 1                          | Red                                   | Support       | 2                          | 7.6          | Red           | 4               |
| 3.1+5.2                         | Red                                   | Leaf          | 1                          | Red                                   | Support       | 3                          | 7.7          | Blue          | 2               |
| 3.1+5.2                         | Red                                   | Support       | 2                          | Red                                   | Support       | 2                          | 7.9          | Black         | 1               |
| 3.1+5.3                         | Red                                   | Leaf          | 1                          | Red                                   | Support       | 4                          | 7.10         | Black         | 2               |
| 3.1+5.3                         | Red                                   | Support       | 2                          | Red                                   | Support       | 4                          | 7.11         | Black         | 1               |
| 3.1+5.3                         | Red                                   | Leaf          | 1                          | Red                                   | Leaf          | 1                          | 7.5          | Blue          | 8               |
| 3.1+5.3                         | Red                                   | Support       | 2                          | Red                                   | Leaf          | 1                          | 7.9          | Black         | 4               |
| 3.1+6.1                         | Red                                   | Leaf          | 1                          | Blue                                  | Leaf          | 1                          | 8.1          | Blue          | 4               |
| 3.1+6.1                         | Red                                   | Leaf          | 1                          | Blue                                  | Internal      | 2                          | 8.10         | Red           | 4               |
| 3.1+6.1                         | Red                                   | Support       | 2                          | Blue                                  | Internal      | 2                          | 8.12         | Blue          | 2               |
| 3.1+6.1                         | Red                                   | Support       | 2                          | Blue                                  | Leaf          | 1                          | 8.2          | Blue          | 2               |
| 3.1+6.1                         | Red                                   | Leaf          | 1                          | Blue                                  | Support       | 2                          | 8.3          | Red           | 4               |
| 3.1+6.1                         | Red                                   | Support       | 2                          | Blue                                  | Support       | 2                          | 8.6          | Blue          | 2               |
| 3.1+6.2                         | Red                                   | Leaf          | 1                          | Red                                   | Internal      | 3                          | 8.12         | Blue          | 2               |
| 3.1+6.2                         | Red                                   | Support       | 2                          | Red                                   | Internal      | 3                          | 8.14         | Black         | 1               |
| 3.1+6.2                         | Red                                   | Leaf          | 1                          | Red                                   | Internal      | 2                          | 8.16         | Blue          | 2               |
| 3.1+6.2                         | Red                                   | Support       | 2                          | Red                                   | Internal      | 2                          | 8.17         | Black         | 1               |
| 3.1+6.2                         | Red                                   | Leaf          | 1                          | Red                                   | Leaf          | 1                          | 8.2          | Blue          | 2               |
| 3.1+6.2                         | Red                                   | Support       | 2                          | Red                                   | Leaf          | 1                          | 8.4          | Blue          | 1               |
| 3.1+6.2                         | Red                                   | Leaf          | 1                          | Red                                   | Leaf          | 1                          | 8.5          | Red           | 4               |
| 3.1+6.2                         | Red                                   | Leaf          | 1                          | Red                                   | Support       | 2                          | 8.7          | Red           | 2               |
| 3.1+6.2                         | Red                                   | Support       | 2                          | Red                                   | Leaf          | 1                          | 8.8          | Blue          | 2               |
| 3.1+6.2                         | Red                                   | Support       | 2                          | Red                                   | Support       | 2                          | 8.9          | Black         | 1               |
| 3.1+6.3                         | Red                                   | Leaf          | 1                          | Blue                                  | Leaf          | 1                          | 8.10         | Red           | 2               |
| 3.1+6.3                         | Red                                   | Leaf          | 1                          | Blue                                  | Support       | 2                          | 8.11         | Red           | 4               |

| RAG<br>Trees<br>to be<br>Merged | DATA FROM<br>THE 1 <sup>st</sup> TREE |               |                            | DATA FROM<br>THE 2 <sup>nd</sup> TREE |               |                            | RESULTS      |               |                 |
|---------------------------------|---------------------------------------|---------------|----------------------------|---------------------------------------|---------------|----------------------------|--------------|---------------|-----------------|
|                                 | Tree<br>Color                         | Vert.<br>Type | <i>deg</i><br>( <i>v</i> ) | Tree<br>Color                         | Vert.<br>Type | <i>deg</i><br>( <i>v</i> ) | RAG<br>Graph | Tree<br>Color | Total<br>Graphs |
| 3.1+6.3                         | Red                                   | Leaf          | 1                          | Blue                                  | Leaf          | 1                          | 8.13         | Blue          | 4               |
| 3.1+6.3                         | Red                                   | Support       | 2                          | Blue                                  | Support       | 2                          | 8.15         | Red           | 2               |
| 3.1+6.3                         | Red                                   | Support       | 2                          | Blue                                  | Leaf          | 1                          | 8.16         | Blue          | 1               |
| 3.1+6.3                         | Red                                   | Leaf          | 1                          | Blue                                  | Support       | 3                          | 8.20         | Red           | 2               |
| 3.1+6.3                         | Red                                   | Support       | 2                          | Blue                                  | Support       | 3                          | 8.21         | Black         | 1               |
| 3.1+6.3                         | Red                                   | Support       | 2                          | Blue                                  | Leaf          | 1                          | 8.7          | Red           | 2               |
| 3.1+6.4                         | Red                                   | Support       | 2                          | Blue                                  | Leaf          | 1                          | 8.13         | Blue          | 4               |
| 3.1+6.4                         | Red                                   | Leaf          | 1                          | Blue                                  | Support       | 3                          | 8.17         | Black         | 4               |
| 3.1+6.4                         | Red                                   | Support       | 2                          | Blue                                  | Support       | 3                          | 8.19         | Black         | 2               |
| 3.1+6.4                         | Red                                   | Leaf          | 1                          | Blue                                  | Leaf          | 1                          | 8.8          | Blue          | 8               |
| 3.1+6.5                         | Red                                   | Leaf          | 1                          | Black                                 | Leaf          | 1                          | 8.12         | Blue          | 6               |
| 3.1+6.5                         | Red                                   | Leaf          | 1                          | Black                                 | Support       | 2                          | 8.15         | Red           | 2               |
| 3.1+6.5                         | Red                                   | Support       | 2                          | Black                                 | Leaf          | 1                          | 8.17         | Black         | 3               |
| 3.1+6.5                         | Red                                   | Support       | 2                          | Black                                 | Support       | 2                          | 8.18         | Black         | 1               |
| 3.1+6.5                         | Red                                   | Leaf          | 1                          | Black                                 | Support       | 4                          | 8.21         | Black         | 2               |
| 3.1+6.5                         | Red                                   | Support       | 2                          | Black                                 | Support       | 4                          | 8.22         | Black         | 1               |
| 3.1+6.5                         | Red                                   | Leaf          | 1                          | Black                                 | Leaf          | 1                          | 8.6          | Blue          | 2               |
| 3.1+6.5                         | Red                                   | Support       | 2                          | Black                                 | Leaf          | 1                          | 8.9          | Black         | 1               |
| 3.1+6.6                         | Red                                   | Leaf          | 1                          | Red                                   | Leaf          | 1                          | 8.14         | Black         | 10              |
| 3.1+6.6                         | Red                                   | Support       | 2                          | Red                                   | Leaf          | 1                          | 8.19         | Black         | 5               |
| 3.1+6.6                         | Red                                   | Leaf          | 1                          | Red                                   | Support       | 5                          | 8.22         | Black         | 2               |
| 3.1+6.6                         | Red                                   | Support       | 2                          | Red                                   | Support       | 5                          | 8.23         | Black         | 1               |
| 3.1+7.1                         | Red                                   | Leaf          | 1                          | Red                                   | Leaf          | 1                          | 9.1          | Unknown       | 4               |
| 3.1+7.1                         | Red                                   | Leaf          | 1                          | Red                                   | Internal      | 2                          | 9.11         | Red           | 4               |
| 3.1+7.1                         | Red                                   | Leaf          | 1                          | Red                                   | Internal      | 2                          | 9.18         | Unknown       | 2               |
| 3.1+7.1                         | Red                                   | Support       | 2                          | Red                                   | Internal      | 2                          | 9.19         | Unknown       | 1               |
| 3.1+7.1                         | Red                                   | Support       | 2                          | Red                                   | Leaf          | 1                          | 9.2          | Unknown       | 2               |
| 3.1+7.1                         | Red                                   | Support       | 2                          | Red                                   | Internal      | 2                          | 9.21         | Unknown       | 2               |
| 3.1+7.1                         | Red                                   | Leaf          | 1                          | Red                                   | Support       | 2                          | 9.4          | Unknown       | 4               |
| 3.1+7.1                         | Red                                   | Support       | 2                          | Red                                   | Support       | 2                          | 9.5          | Unknown       | 2               |
| 3.1+7.10                        | Red                                   | Leaf          | 1                          | Black                                 | Leaf          | 1                          | 9.15         | Unknown       | 2               |
| 3.1+7.10                        | Red                                   | Support       | 2                          | Black                                 | Leaf          | 1                          | 9.25         | Unknown       | 1               |
| 3.1+7.10                        | Red                                   | Leaf          | 1                          | Black                                 | Leaf          | 1                          | 9.31         | Unknown       | 8               |
| 3.1+7.10                        | Red                                   | Leaf          | 1                          | Black                                 | Support       | 2                          | 9.36         | Unknown       | 2               |
| 3.1+7.10                        | Red                                   | Support       | 2                          | Black                                 | Leaf          | 1                          | 9.39         | Unknown       | 4               |
| 3.1+7.10                        | Red                                   | Support       | 2                          | Black                                 | Support       | 2                          | 9.40         | Unknown       | 1               |
| 3.1+7.10                        | Red                                   | Leaf          | 1                          | Black                                 | Support       | 5                          | 9.45         | Unknown       | 2               |
| 3.1+7.10                        | Red                                   | Support       | 2                          | Black                                 | Support       | 5                          | 9.46         | Unknown       | 1               |
| 3.1+7.11                        | Red                                   | Leaf          | 1                          | Black                                 | Leaf          | 1                          | 9.32         | Unknown       | 12              |
| 3.1+7.11                        | Red                                   | Support       | 2                          | Black                                 | Leaf          | 1                          | 9.41         | Unknown       | 6               |
| 3.1+7.11                        | Red                                   | Leaf          | 1                          | Black                                 | Support       | 6                          | 9.46         | Unknown       | 2               |

| RAG<br>Trees<br>to be<br>Merged | DATA FROM<br>THE 1 <sup>st</sup> TREE |               |                            | DATA FROM<br>THE 2 <sup>nd</sup> TREE |               |                            | RESULTS      |               |                 |
|---------------------------------|---------------------------------------|---------------|----------------------------|---------------------------------------|---------------|----------------------------|--------------|---------------|-----------------|
|                                 | Tree<br>Color                         | Vert.<br>Type | <i>deg</i><br>( <i>v</i> ) | Tree<br>Color                         | Vert.<br>Type | <i>deg</i><br>( <i>v</i> ) | RAG<br>Graph | Tree<br>Color | Total<br>Graphs |
| 3.1+7.11                        | Red                                   | Support       | 2                          | Black                                 | Support       | 6                          | 9.47         | Unknown       | 1               |
| 3.1+7.2                         | Red                                   | Support       | 2                          | Red                                   | Support       | 3                          | 9.15         | Unknown       | 1               |
| 3.1+7.2                         | Red                                   | Leaf          | 1                          | Red                                   | Internal      | 2                          | 9.17         | Unknown       | 2               |
| 3.1+7.2                         | Red                                   | Leaf          | 1                          | Red                                   | Leaf          | 1                          | 9.2          | Unknown       | 2               |
| 3.1+7.2                         | Red                                   | Leaf          | 1                          | Red                                   | Support       | 3                          | 9.21         | Unknown       | 2               |
| 3.1+7.2                         | Red                                   | Support       | 2                          | Red                                   | Internal      | 2                          | 9.22         | Unknown       | 1               |
| 3.1+7.2                         | Red                                   | Leaf          | 1                          | Red                                   | Internal      | 2                          | 9.26         | Unknown       | 2               |
| 3.1+7.2                         | Red                                   | Support       | 2                          | Red                                   | Leaf          | 1                          | 9.3          | Unknown       | 1               |
| 3.1+7.2                         | Red                                   | Support       | 2                          | Red                                   | Internal      | 2                          | 9.44         | Unknown       | 1               |
| 3.1+7.2                         | Red                                   | Leaf          | 1                          | Red                                   | Leaf          | 1                          | 9.6          | Red           | 4               |
| 3.1+7.2                         | Red                                   | Leaf          | 1                          | Red                                   | Support       | 2                          | 9.7          | Unknown       | 2               |
| 3.1+7.2                         | Red                                   | Support       | 2                          | Red                                   | Leaf          | 1                          | 9.8          | Unknown       | 2               |
| 3.1+7.2                         | Red                                   | Support       | 2                          | Red                                   | Support       | 2                          | 9.9          | Unknown       | 1               |
| 3.1+7.3                         | Red                                   | Support       | 2                          | Red                                   | Leaf          | 1                          | 9.10         | Unknown       | 1               |
| 3.1+7.3                         | Red                                   | Leaf          | 1                          | Red                                   | Support       | 2                          | 9.12         | Unknown       | 2               |
| 3.1+7.3                         | Red                                   | Leaf          | 1                          | Red                                   | Support       | 2                          | 9.14         | Unknown       | 2               |
| 3.1+7.3                         | Red                                   | Support       | 2                          | Red                                   | Support       | 2                          | 9.16         | Unknown       | 1               |
| 3.1+7.3                         | Red                                   | Leaf          | 1                          | Red                                   | Leaf          | 1                          | 9.18         | Unknown       | 2               |
| 3.1+7.3                         | Red                                   | Support       | 2                          | Red                                   | Support       | 2                          | 9.20         | Unknown       | 1               |
| 3.1+7.3                         | Red                                   | Support       | 2                          | Red                                   | Leaf          | 1                          | 9.26         | Unknown       | 1               |
| 3.1+7.3                         | Red                                   | Leaf          | 1                          | Red                                   | Internal      | 2                          | 9.27         | Red           | 2               |
| 3.1+7.3                         | Red                                   | Leaf          | 1                          | Red                                   | Internal      | 3                          | 9.29         | Unknown       | 2               |
| 3.1+7.3                         | Red                                   | Support       | 2                          | Red                                   | Internal      | 2                          | 9.30         | Unknown       | 1               |
| 3.1+7.3                         | Red                                   | Support       | 2                          | Red                                   | Internal      | 3                          | 9.31         | Unknown       | 1               |
| 3.1+7.3                         | Red                                   | Leaf          | 1                          | Red                                   | Leaf          | 1                          | 9.4          | Unknown       | 2               |
| 3.1+7.3                         | Red                                   | Leaf          | 1                          | Red                                   | Leaf          | 1                          | 9.6          | Red           | 2               |
| 3.1+7.3                         | Red                                   | Support       | 2                          | Red                                   | Leaf          | 1                          | 9.7          | Unknown       | 1               |
| 3.1+7.4                         | Red                                   | Leaf          | 1                          | Blue                                  | Leaf          | 1                          | 9.10         | Unknown       | 8               |
| 3.1+7.4                         | Red                                   | Support       | 2                          | Blue                                  | Leaf          | 1                          | 9.13         | Red           | 4               |
| 3.1+7.4                         | Red                                   | Leaf          | 1                          | Blue                                  | Support       | 3                          | 9.22         | Unknown       | 4               |
| 3.1+7.4                         | Red                                   | Support       | 2                          | Blue                                  | Support       | 3                          | 9.25         | Unknown       | 2               |
| 3.1+7.4                         | Red                                   | Leaf          | 1                          | Blue                                  | Internal      | 2                          | 9.33         | Unknown       | 2               |
| 3.1+7.4                         | Red                                   | Support       | 2                          | Blue                                  | Internal      | 2                          | 9.35         | Unknown       | 1               |
| 3.1+7.5                         | Red                                   | Leaf          | 1                          | Blue                                  | Support       | 2                          | 9.16         | Unknown       | 2               |
| 3.1+7.5                         | Red                                   | Leaf          | 1                          | Blue                                  | Leaf          | 1                          | 9.19         | Unknown       | 6               |
| 3.1+7.5                         | Red                                   | Support       | 2                          | Blue                                  | Support       | 2                          | 9.23         | Unknown       | 1               |
| 3.1+7.5                         | Red                                   | Leaf          | 1                          | Blue                                  | Support       | 4                          | 9.31         | Unknown       | 2               |
| 3.1+7.5                         | Red                                   | Support       | 2                          | Blue                                  | Support       | 4                          | 9.32         | Unknown       | 1               |
| 3.1+7.5                         | Red                                   | Leaf          | 1                          | Blue                                  | Internal      | 2                          | 9.34         | Unknown       | 2               |
| 3.1+7.5                         | Red                                   | Support       | 2                          | Blue                                  | Internal      | 2                          | 9.37         | Unknown       | 1               |
| 3.1+7.5                         | Red                                   | Support       | 2                          | Blue                                  | Leaf          | 1                          | 9.44         | Unknown       | 3               |
| 3.1+7.5                         | Red                                   | Leaf          | 1                          | Blue                                  | Leaf          | 1                          | 9.5          | Unknown       | 2               |



| RAG<br>Trees<br>to be<br>Merged | DATA FROM<br>THE 1 <sup>st</sup> TREE |               |                            | DATA FROM<br>THE 2 <sup>nd</sup> TREE |               |                            | RESULTS      |               |                 |
|---------------------------------|---------------------------------------|---------------|----------------------------|---------------------------------------|---------------|----------------------------|--------------|---------------|-----------------|
|                                 | Tree<br>Color                         | Vert.<br>Type | <i>deg</i><br>( <i>v</i> ) | Tree<br>Color                         | Vert.<br>Type | <i>deg</i><br>( <i>v</i> ) | RAG<br>Graph | Tree<br>Color | Total<br>Graphs |
| 3.1+7.5                         | Red                                   | Support       | 2                          | Blue                                  | Leaf          | 1                          | 9.9          | Unknown       | 1               |
| 3.1+7.6                         | Red                                   | Support       | 2                          | Red                                   | Leaf          | 1                          | 9.13         | Red           | 1               |
| 3.1+7.6                         | Red                                   | Leaf          | 1                          | Red                                   | Leaf          | 1                          | 9.14         | Unknown       | 4               |
| 3.1+7.6                         | Red                                   | Leaf          | 1                          | Red                                   | Support       | 2                          | 9.24         | Unknown       | 2               |
| 3.1+7.6                         | Red                                   | Support       | 2                          | Red                                   | Leaf          | 1                          | 9.24         | Unknown       | 2               |
| 3.1+7.6                         | Red                                   | Leaf          | 1                          | Red                                   | Leaf          | 1                          | 9.26         | Unknown       | 2               |
| 3.1+7.6                         | Red                                   | Support       | 2                          | Red                                   | Support       | 2                          | 9.28         | Unknown       | 1               |
| 3.1+7.6                         | Red                                   | Leaf          | 1                          | Red                                   | Support       | 3                          | 9.30         | Unknown       | 2               |
| 3.1+7.6                         | Red                                   | Support       | 2                          | Red                                   | Leaf          | 1                          | 9.33         | Unknown       | 1               |
| 3.1+7.6                         | Red                                   | Support       | 2                          | Red                                   | Support       | 3                          | 9.36         | Unknown       | 1               |
| 3.1+7.6                         | Red                                   | Leaf          | 1                          | Red                                   | Internal      | 3                          | 9.38         | Unknown       | 2               |
| 3.1+7.6                         | Red                                   | Support       | 2                          | Red                                   | Internal      | 3                          | 9.39         | Unknown       | 1               |
| 3.1+7.6                         | Red                                   | Leaf          | 1                          | Red                                   | Leaf          | 1                          | 9.8          | Unknown       | 2               |
| 3.1+7.7                         | Red                                   | Leaf          | 1                          | Blue                                  | Leaf          | 1                          | 9.21         | Unknown       | 4               |
| 3.1+7.7                         | Red                                   | Support       | 2                          | Blue                                  | Leaf          | 1                          | 9.22         | Unknown       | 2               |
| 3.1+7.7                         | Red                                   | Leaf          | 1                          | Blue                                  | Leaf          | 1                          | 9.29         | Unknown       | 4               |
| 3.1+7.7                         | Red                                   | Leaf          | 1                          | Blue                                  | Support       | 2                          | 9.30         | Unknown       | 4               |
| 3.1+7.7                         | Red                                   | Support       | 2                          | Blue                                  | Support       | 2                          | 9.37         | Unknown       | 2               |
| 3.1+7.7                         | Red                                   | Support       | 2                          | Blue                                  | Leaf          | 1                          | 9.38         | Unknown       | 2               |
| 3.1+7.7                         | Red                                   | Leaf          | 1                          | Blue                                  | Internal      | 4                          | 9.43         | Unknown       | 2               |
| 3.1+7.7                         | Red                                   | Support       | 2                          | Blue                                  | Internal      | 3                          | 9.45         | Unknown       | 1               |
| 3.1+7.8                         | Red                                   | Leaf          | 1                          | Blue                                  | Leaf          | 1                          | 9.11         | Red           | 6               |
| 3.1+7.8                         | Red                                   | Support       | 2                          | Blue                                  | Leaf          | 1                          | 9.17         | Unknown       | 3               |
| 3.1+7.8                         | Red                                   | Leaf          | 1                          | Blue                                  | Support       | 2                          | 9.27         | Red           | 6               |
| 3.1+7.8                         | Red                                   | Support       | 2                          | Blue                                  | Support       | 2                          | 9.34         | Unknown       | 3               |
| 3.1+7.8                         | Red                                   | Leaf          | 1                          | Blue                                  | Internal      | 3                          | 9.42         | Unknown       | 2               |
| 3.1+7.8                         | Red                                   | Support       | 2                          | Blue                                  | Internal      | 3                          | 9.43         | Unknown       | 1               |
| 3.1+7.9                         | Red                                   | Leaf          | 1                          | Black                                 | Leaf          | 1                          | 9.20         | Unknown       | 4               |
| 3.1+7.9                         | Red                                   | Support       | 2                          | Black                                 | Leaf          | 1                          | 9.28         | Unknown       | 2               |
| 3.1+7.9                         | Red                                   | Support       | 2                          | Black                                 | Leaf          | 1                          | 9.35         | Unknown       | 3               |
| 3.1+7.9                         | Red                                   | Leaf          | 1                          | Black                                 | Support       | 3                          | 9.37         | Unknown       | 2               |
| 3.1+7.9                         | Red                                   | Leaf          | 1                          | Black                                 | Support       | 4                          | 9.39         | Unknown       | 2               |
| 3.1+7.9                         | Red                                   | Support       | 2                          | Black                                 | Support       | 3                          | 9.40         | Unknown       | 1               |
| 3.1+7.9                         | Red                                   | Support       | 2                          | Black                                 | Support       | 3                          | 9.41         | Unknown       | 1               |
| 3.1+7.9                         | Red                                   | Leaf          | 1                          | Black                                 | Leaf          | 1                          | 9.44         | Unknown       | 6               |
| 4.1+4.1                         | Red                                   | Leaf          | 1                          | Red                                   | Leaf          | 1                          | 7.1          | Red           | 4               |
| 4.1+4.1                         | Red                                   | Leaf          | 1                          | Red                                   | Support       | 2                          | 7.3          | Red           | 8               |
| 4.1+4.1                         | Red                                   | Support       | 2                          | Red                                   | Support       | 2                          | 7.7          | Blue          | 4               |
| 4.1+4.2                         | Red                                   | Support       | 2                          | Blue                                  | Support       | 3                          | 7.10         | Black         | 2               |
| 4.1+4.2                         | Red                                   | Leaf          | 1                          | Blue                                  | Leaf          | 1                          | 7.2          | Red           | 6               |
| 4.1+4.2                         | Red                                   | Leaf          | 1                          | Blue                                  | Support       | 3                          | 7.5          | Blue          | 2               |

| RAG<br>Trees<br>to be<br>Merged | DATA FROM<br>THE 1 <sup>st</sup> TREE |               |                            | DATA FROM<br>THE 2 <sup>nd</sup> TREE |               |                            | RESULTS      |               |                 |
|---------------------------------|---------------------------------------|---------------|----------------------------|---------------------------------------|---------------|----------------------------|--------------|---------------|-----------------|
|                                 | Tree<br>Color                         | Vert.<br>Type | <i>deg</i><br>( <i>v</i> ) | Tree<br>Color                         | Vert.<br>Type | <i>deg</i><br>( <i>v</i> ) | RAG<br>Graph | Tree<br>Color | Total<br>Graphs |
| 4.1+4.2                         | Red                                   | Support       | 2                          | Blue                                  | Leaf          | 1                          | 7.6          | Red           | 6               |
| 4.1+5.1                         | Red                                   | Leaf          | 1                          | Red                                   | Leaf          | 1                          | 8.1          | Blue          | 4               |
| 4.1+5.1                         | Red                                   | Leaf          | 1                          | Red                                   | Internal      | 2                          | 8.10         | Red           | 2               |
| 4.1+5.1                         | Red                                   | Support       | 2                          | Red                                   | Support       | 2                          | 8.12         | Blue          | 4               |
| 4.1+5.1                         | Red                                   | Support       | 2                          | Red                                   | Internal      | 2                          | 8.20         | Red           | 2               |
| 4.1+5.1                         | Red                                   | Support       | 2                          | Red                                   | Leaf          | 1                          | 8.3          | Red           | 4               |
| 4.1+5.1                         | Red                                   | Leaf          | 1                          | Red                                   | Support       | 2                          | 8.5          | Red           | 4               |
| 4.1+5.2                         | Red                                   | Support       | 2                          | Red                                   | Support       | 3                          | 8.12         | Blue          | 2               |
| 4.1+5.2                         | Red                                   | Support       | 2                          | Red                                   | Support       | 2                          | 8.17         | Black         | 2               |
| 4.1+5.2                         | Red                                   | Leaf          | 1                          | Red                                   | Leaf          | 1                          | 8.2          | Blue          | 2               |
| 4.1+5.2                         | Red                                   | Support       | 2                          | Red                                   | Support       | 3                          | 8.21         | Black         | 2               |
| 4.1+5.2                         | Red                                   | Leaf          | 1                          | Red                                   | Leaf          | 1                          | 8.3          | Red           | 4               |
| 4.1+5.2                         | Red                                   | Support       | 2                          | Red                                   | Leaf          | 1                          | 8.7          | Red           | 2               |
| 4.1+5.2                         | Red                                   | Leaf          | 1                          | Red                                   | Support       | 2                          | 8.8          | Blue          | 2               |
| 4.1+5.2                         | Red                                   | Support       | 2                          | Red                                   | Leaf          | 1                          | 8. 11        | Red           | 4               |
| 4.1+5.3                         | Red                                   | Leaf          | 1                          | Red                                   | Support       | 4                          | 8.14         | Black         | 2               |
| 4.1+5.3                         | Red                                   | Support       | 2                          | Red                                   | Leaf          | 1                          | 8.15         | Red           | 8               |
| 4.1+5.3                         | Red                                   | Support       | 2                          | Red                                   | Support       | 4                          | 8.22         | Black         | 2               |
| 4.1+5.3                         | Red                                   | Leaf          | 1                          | Red                                   | Leaf          | 1                          | 8.6          | Blue          | 8               |
| 4.1+6.1                         | Red                                   | Leaf          | 1                          | Blue                                  | Leaf          | 1                          | 9.1          | Unknown       | 4               |
| 4.1+6.1                         | Red                                   | Leaf          | 1                          | Blue                                  | Internal      | 2                          | 9.18         | Unknown       | 4               |
| 4.1+6.1                         | Red                                   | Support       | 2                          | Blue                                  | Support       | 2                          | 9.21         | Unknown       | 4               |
| 4.1+6.1                         | Red                                   | Support       | 2                          | Blue                                  | Internal      | 2                          | 9.29         | Unknown       | 4               |
| 4.1+6.1                         | Red                                   | Support       | 2                          | Blue                                  | Leaf          | 1                          | 9.4          | Unknown       | 4               |
| 4.1+6.1                         | Red                                   | Leaf          | 1                          | Blue                                  | Support       | 2                          | 9.6          | Red           | 4               |
| 4.1+6.2                         | Red                                   | Leaf          | 1                          | Red                                   | Support       | 2                          | 9.10         | Unknown       | 2               |
| 4.1+6.2                         | Red                                   | Support       | 2                          | Red                                   | Leaf          | 1                          | 9.14         | Unknown       | 4               |
| 4.1+6.2                         | Red                                   | Leaf          | 1                          | Red                                   | Support       | 3                          | 9.19         | Unknown       | 2               |
| 4.1+6.2                         | Red                                   | Leaf          | 1                          | Red                                   | Leaf          | 1                          | 9.2          | Unknown       | 2               |
| 4.1+6.2                         | Red                                   | Support       | 2                          | Red                                   | Support       | 2                          | 9.22         | Unknown       | 2               |
| 4.1+6.2                         | Red                                   | Leaf          | 1                          | Red                                   | Internal      | 2                          | 9.26         | Unknown       | 2               |
| 4.1+6.2                         | Red                                   | Support       | 2                          | Red                                   | Support       | 3                          | 9.31         | Unknown       | 2               |
| 4.1+6.2                         | Red                                   | Support       | 2                          | Red                                   | Internal      | 2                          | 9.38         | Unknown       | 2               |
| 4.1+6.2                         | Red                                   | Leaf          | 1                          | Red                                   | Leaf          | 1                          | 9.6          | Red           | 4               |
| 4.1+6.2                         | Red                                   | Support       | 2                          | Red                                   | Leaf          | 1                          | 9.7          | Unknown       | 2               |
| 4.1+6.3                         | Red                                   | Leaf          | 1                          | Blue                                  | Leaf          | 1                          | 9.11         | Red           | 2               |
| 4.1+6.3                         | Red                                   | Support       | 2                          | Blue                                  | Leaf          | 1                          | 9.12         | Unknown       | 4               |
| 4.1+6.3                         | Red                                   | Leaf          | 1                          | Blue                                  | Support       | 2                          | 9.14         | Unknown       | 4               |
| 4.1+6.3                         | Red                                   | Support       | 2                          | Blue                                  | Leaf          | 1                          | 9.27         | Red           | 2               |
| 4.1+6.3                         | Red                                   | Leaf          | 1                          | Blue                                  | Support       | 3                          | 9.29         | Unknown       | 2               |
| 4.1+6.3                         | Red                                   | Support       | 2                          | Blue                                  | Support       | 2                          | 9.30         | Unknown       | 4               |

| RAG<br>Trees<br>to be<br>Merged | DATA FROM<br>THE 1 <sup>st</sup> TREE |               |                            | DATA FROM<br>THE 2 <sup>nd</sup> TREE |               |                            | RESULTS      |               |                 |
|---------------------------------|---------------------------------------|---------------|----------------------------|---------------------------------------|---------------|----------------------------|--------------|---------------|-----------------|
|                                 | Tree<br>Color                         | Vert.<br>Type | <i>deg</i><br>( <i>v</i> ) | Tree<br>Color                         | Vert.<br>Type | <i>deg</i><br>( <i>v</i> ) | RAG<br>Graph | Tree<br>Color | Total<br>Graphs |
| 4.1+6.3                         | Red                                   | Leaf          | 1                          | Blue                                  | Leaf          | 1                          | 9.4          | Unknown       | 4               |
| 4.1+6.3                         | Red                                   | Support       | 2                          | Blue                                  | Support       | 3                          | 9.43         | Unknown       | 2               |
| 4.1+6.4                         | Red                                   | Support       | 2                          | Blue                                  | Leaf          | 1                          | 9.24         | Unknown       | 8               |
| 4.1+6.4                         | Red                                   | Support       | 2                          | Blue                                  | Support       | 3                          | 9.39         | Unknown       | 4               |
| 4.1+6.4                         | Red                                   | Leaf          | 1                          | Blue                                  | Support       | 3                          | 9.44         | Unknown       | 4               |
| 4.1+6.4                         | Red                                   | Leaf          | 1                          | Blue                                  | Leaf          | 1                          | 9.8          | Unknown       | 8               |
| 4.1+6.5                         | Red                                   | Support       | 2                          | Black                                 | Leaf          | 1                          | 9.16         | Unknown       | 2               |
| 4.1+6.5                         | Red                                   | Leaf          | 1                          | Black                                 | Support       | 2                          | 9.20         | Unknown       | 2               |
| 4.1+6.5                         | Red                                   | Leaf          | 1                          | Black                                 | Leaf          | 1                          | 9.21         | Unknown       | 6               |
| 4.1+6.5                         | Red                                   | Support       | 2                          | Black                                 | Leaf          | 1                          | 9.30         | Unknown       | 6               |
| 4.1+6.5                         | Red                                   | Leaf          | 1                          | Black                                 | Support       | 4                          | 9.31         | Unknown       | 2               |
| 4.1+6.5                         | Red                                   | Support       | 2                          | Black                                 | Support       | 2                          | 9.37         | Unknown       | 2               |
| 4.1+6.5                         | Red                                   | Support       | 2                          | Black                                 | Support       | 4                          | 9.45         | Unknown       | 2               |
| 4.1+6.5                         | Red                                   | Leaf          | 1                          | Black                                 | Leaf          | 1                          | 9.5          | Unknown       | 2               |
| 4.1+6.6                         | Red                                   | Leaf          | 1                          | Red                                   | Leaf          | 1                          | 9.15         | Unknown       | 10              |
| 4.1+6.6                         | Red                                   | Leaf          | 1                          | Red                                   | Support       | 5                          | 9.32         | Unknown       | 2               |
| 4.1+6.6                         | Red                                   | Support       | 2                          | Red                                   | Leaf          | 1                          | 9.36         | Unknown       | 10              |
| 4.1+6.6                         | Red                                   | Support       | 2                          | Red                                   | Support       | 5                          | 9.46         | Unknown       | 2               |
| 4.2+4.2                         | Blue                                  | Support       | 3                          | Blue                                  | Support       | 3                          | 7.11         | Black         | 1               |
| 4.2+4.2                         | Blue                                  | Leaf          | 1                          | Blue                                  | Leaf          | 1                          | 7.4          | Blue          | 9               |
| 4.2+4.2                         | Blue                                  | Leaf          | 1                          | Blue                                  | Support       | 3                          | 7.9          | Black         | 6               |
| 4.2+5.1                         | Blue                                  | Support       | 3                          | Red                                   | Support       | 2                          | 8.14         | Black         | 2               |
| 4.2+5.1                         | Blue                                  | Leaf          | 1                          | Red                                   | Internal      | 2                          | 8.16         | Blue          | 3               |
| 4.2+5.1                         | Blue                                  | Leaf          | 1                          | Red                                   | Leaf          | 1                          | 8.2          | Blue          | 6               |
| 4.2+5.1                         | Blue                                  | Support       | 3                          | Red                                   | Internal      | 2                          | 8.21         | Black         | 1               |
| 4.2+5.1                         | Blue                                  | Support       | 3                          | Red                                   | Leaf          | 1                          | 8.6          | Blue          | 2               |
| 4.2+5.1                         | Blue                                  | Leaf          | 1                          | Red                                   | Support       | 2                          | 8.8          | Blue          | 6               |
| 4.2+5.2                         | Blue                                  | Leaf          | 1                          | Red                                   | Support       | 2                          | 8.13         | Blue          | 3               |
| 4.2+5.2                         | Blue                                  | Support       | 3                          | Red                                   | Leaf          | 1                          | 8.15         | Red           | 2               |
| 4.2+5.2                         | Blue                                  | Leaf          | 1                          | Red                                   | Support       | 3                          | 8.17         | Black         | 3               |
| 4.2+5.2                         | Blue                                  | Support       | 3                          | Red                                   | Support       | 2                          | 8.19         | Black         | 1               |
| 4.2+5.2                         | Blue                                  | Support       | 3                          | Red                                   | Support       | 3                          | 8.22         | Black         | 1               |
| 4.2+5.2                         | Blue                                  | Leaf          | 1                          | Red                                   | Leaf          | 1                          | 8.4          | Blue          | 3               |
| 4.2+5.2                         | Blue                                  | Leaf          | 1                          | Red                                   | Leaf          | 1                          | 8.7          | Red           | 6               |
| 4.2+5.2                         | Blue                                  | Support       | 3                          | Red                                   | Leaf          | 1                          | 8.9          | Black         | 1               |
| 4.2+5.3                         | Blue                                  | Support       | 3                          | Red                                   | Leaf          | 1                          | 8.18         | Black         | 4               |
| 4.2+5.3                         | Blue                                  | Leaf          | 1                          | Red                                   | Support       | 4                          | 8.19         | Black         | 3               |
| 4.2+5.3                         | Blue                                  | Support       | 3                          | Red                                   | Support       | 4                          | 8.23         | Black         | 1               |
| 4.2+5.3                         | Blue                                  | Leaf          | 1                          | Red                                   | Leaf          | 1                          | 8.9          | Black         | 12              |
| 4.2+6.1                         | Blue                                  | Support       | 3                          | Blue                                  | Support       | 2                          | 9.15         | Unknown       | 2               |
| 4.2+6.1                         | Blue                                  | Leaf          | 1                          | Blue                                  | Leaf          | 1                          | 9.2          | Unknown       | 6               |
| 4.2+6.1                         | Blue                                  | Leaf          | 1                          | Blue                                  | Internal      | 2                          | 9.26         | Unknown       | 6               |

| RAG<br>Trees<br>to be<br>Merged | DATA FROM<br>THE 1 <sup>st</sup> TREE |               |                            | DATA FROM<br>THE 2 <sup>nd</sup> TREE |               |                            | RESULTS      |               |                 |
|---------------------------------|---------------------------------------|---------------|----------------------------|---------------------------------------|---------------|----------------------------|--------------|---------------|-----------------|
|                                 | Tree<br>Color                         | Vert.<br>Type | <i>deg</i><br>( <i>v</i> ) | Tree<br>Color                         | Vert.<br>Type | <i>deg</i><br>( <i>v</i> ) | RAG<br>Graph | Tree<br>Color | Total<br>Graphs |
| 4.2+6.1                         | Blue                                  | Support       | 3                          | Blue                                  | Internal      | 2                          | 9.31         | Unknown       | 2               |
| 4.2+6.1                         | Blue                                  | Support       | 3                          | Blue                                  | Leaf          | 1                          | 9.5          | Unknown       | 2               |
| 4.2+6.1                         | Blue                                  | Leaf          | 1                          | Blue                                  | Support       | 2                          | 9.8          | Unknown       | 6               |
| 4.2+6.2                         | Blue                                  | Leaf          | 1                          | Red                                   | Leaf          | 1                          | 9.10         | Unknown       | 6               |
| 4.2+6.2                         | Blue                                  | Leaf          | 1                          | Red                                   | Support       | 2                          | 9.13         | Red           | 3               |
| 4.2+6.2                         | Blue                                  | Support       | 3                          | Red                                   | Leaf          | 1                          | 9.20         | Unknown       | 2               |
| 4.2+6.2                         | Blue                                  | Support       | 3                          | Red                                   | Support       | 2                          | 9.25         | Unknown       | 1               |
| 4.2+6.2                         | Blue                                  | Leaf          | 1                          | Red                                   | Leaf          | 1                          | 9.3          | Unknown       | 3               |
| 4.2+6.2                         | Blue                                  | Support       | 3                          | Red                                   | Support       | 3                          | 9.32         | Unknown       | 1               |
| 4.2+6.2                         | Blue                                  | Leaf          | 1                          | Red                                   | Internal      | 2                          | 9.33         | Unknown       | 3               |
| 4.2+6.2                         | Blue                                  | Support       | 3                          | Red                                   | Internal      | 2                          | 9.39         | Unknown       | 1               |
| 4.2+6.2                         | Blue                                  | Leaf          | 1                          | Red                                   | Support       | 3                          | 9.44         | Unknown       | 3               |
| 4.2+6.2                         | Blue                                  | Support       | 3                          | Red                                   | Leaf          | 1                          | 9.9          | Unknown       | 1               |
| 4.2+6.3                         | Blue                                  | Support       | 3                          | Blue                                  | Leaf          | 1                          | 9.16         | Unknown       | 2               |
| 4.2+6.3                         | Blue                                  | Leaf          | 1                          | Blue                                  | Leaf          | 1                          | 9.17         | Unknown       | 3               |
| 4.2+6.3                         | Blue                                  | Leaf          | 1                          | Blue                                  | Support       | 2                          | 9.24         | Unknown       | 6               |
| 4.2+6.3                         | Blue                                  | Support       | 3                          | Blue                                  | Leaf          | 1                          | 9.34         | Unknown       | 1               |
| 4.2+6.3                         | Blue                                  | Support       | 3                          | Blue                                  | Support       | 2                          | 9.36         | Unknown       | 2               |
| 4.2+6.3                         | Blue                                  | Leaf          | 1                          | Blue                                  | Internal      | 3                          | 9.38         | Unknown       | 3               |
| 4.2+6.3                         | Blue                                  | Support       | 3                          | Blue                                  | Internal      | 3                          | 9.45         | Unknown       | 1               |
| 4.2+6.3                         | Blue                                  | Leaf          | 1                          | Blue                                  | Leaf          | 1                          | 9.7          | Unknown       | 6               |
| 4.2+6.4                         | Blue                                  | Leaf          | 1                          | Blue                                  | Leaf          | 1                          | 9.13         | Red           | 12              |
| 4.2+6.4                         | Blue                                  | Support       | 3                          | Blue                                  | Leaf          | 1                          | 9.28         | Unknown       | 4               |
| 4.2+6.4                         | Blue                                  | Leaf          | 1                          | Blue                                  | Support       | 3                          | 9.35         | Unknown       | 6               |
| 4.2+6.4                         | Blue                                  | Support       | 3                          | Blue                                  | Support       | 3                          | 9.41         | Unknown       | 2               |
| 4.2+6.5                         | Blue                                  | leaf          | 1                          | Black                                 | Leaf          | 1                          | 9.22         | Unknown       | 9               |
| 4.2+6.5                         | Blue                                  | Support       | 3                          | Black                                 | Leaf          | 1                          | 9.23         | Unknown       | 1               |
| 4.2+6.5                         | Blue                                  | leaf          | 1                          | Black                                 | Support       | 2                          | 9.28         | Unknown       | 3               |
| 4.2+6.5                         | Blue                                  | Support       | 3                          | Black                                 | Leaf          | 1                          | 9.37         | Unknown       | 3               |
| 4.2+6.5                         | Blue                                  | Leaf          | 1                          | Black                                 | Support       | 4                          | 9.39         | Unknown       | 3               |
| 4.2+6.5                         | Blue                                  | Support       | 3                          | Black                                 | Support       | 2                          | 9.40         | Unknown       | 1               |
| 4.2+6.5                         | Blue                                  | Support       | 3                          | Black                                 | Support       | 4                          | 9.46         | Unknown       | 1               |
| 4.2+6.5                         | Blue                                  | leaf          | 1                          | Black                                 | Leaf          | 1                          | 9.9          | Unknown       | 3               |
| 4.2+6.6                         | Blue                                  | Leaf          | 1                          | Red                                   | Leaf          | 1                          | 9.25         | Unknown       | 15              |
| 4.2+6.6                         | Blue                                  | Support       | 3                          | Red                                   | Leaf          | 1                          | 9.40         | Unknown       | 5               |
| 4.2+6.6                         | Blue                                  | Leaf          | 1                          | Red                                   | Support       | 5                          | 9.41         | Unknown       | 3               |
| 4.2+6.6                         | Blue                                  | Support       | 3                          | Red                                   | Support       | 5                          | 9.47         | Unknown       | 1               |
| 5.1+5.1                         | Red                                   | leaf          | 1                          | Red                                   | Leaf          | 1                          | 9.1          | Unknown       | 4               |
| 5.1+5.1                         | Red                                   | Leaf          | 1                          | Red                                   | Support       | 2                          | 9.6          | Red           | 8               |
| 5.1+5.1                         | Red                                   | Support       | 2                          | Red                                   | Support       | 2                          | 9.19         | Unknown       | 4               |

| RAG<br>Trees<br>to be<br>Merged | DATA FROM<br>THE 1 <sup>st</sup> TREE |               |                            | DATA FROM<br>THE 2 <sup>nd</sup> TREE |               |                            | RESULTS      |               |                 |
|---------------------------------|---------------------------------------|---------------|----------------------------|---------------------------------------|---------------|----------------------------|--------------|---------------|-----------------|
|                                 | Tree<br>Color                         | Vert.<br>Type | <i>deg</i><br>( <i>v</i> ) | Tree<br>Color                         | Vert.<br>Type | <i>deg</i><br>( <i>v</i> ) | RAG<br>Graph | Tree<br>Color | Total<br>Graphs |
| 5.1+5.1                         | Red                                   | leaf          | 1                          | Red                                   | Internal      | 2                          | 9.11         | Red           | 4               |
| 5.1+5.1                         | Red                                   | Leaf          | 1                          | Red                                   | Internal      | 2                          | 9.29         | Unknown       | 4               |
| 5.1+5.1                         | Red                                   | Internal      | 2                          | Red                                   | Internal      | 2                          | 9.42         | Unknown       | 1               |
| 5.1+5.2                         | Red                                   | Support       | 2                          | Red                                   | Leaf          | 1                          | 9.10         | Unknown       | 2               |
| 5.1+5.2                         | Red                                   | Support       | 2                          | Red                                   | Leaf          | 1                          | 9.14         | Unknown       | 4               |
| 5.1+5.2                         | Red                                   | Internal      | 2                          | Red                                   | Leaf          | 1                          | 9.17         | Unknown       | 1               |
| 5.1+5.2                         | Red                                   | Leaf          | 1                          | Red                                   | Leaf          | 1                          | 9.2          | Unknown       | 2               |
| 5.1+5.2                         | Red                                   | Leaf          | 1                          | Red                                   | Support       | 3                          | 9.21         | Unknown       | 2               |
| 5.1+5.2                         | Red                                   | Internal      | 2                          | Red                                   | Leaf          | 1                          | 9.27         | Red           | 2               |
| 5.1+5.2                         | Red                                   | Support       | 2                          | Red                                   | Support       | 3                          | 9.31         | Unknown       | 2               |
| 5.1+5.2                         | Red                                   | Internal      | 2                          | Red                                   | Support       | 2                          | 9.38         | Unknown       | 1               |
| 5.1+5.2                         | Red                                   | Leaf          | 1                          | Red                                   | Leaf          | 1                          | 9.4          | Unknown       | 4               |
| 5.1+5.2                         | Red                                   | Internal      | 2                          | Red                                   | Support       | 3                          | 9.43         | Unknown       | 1               |
| 5.1+5.2                         | Red                                   | Support       | 2                          | Red                                   | Support       | 2                          | 9.44         | Unknown       | 2               |
| 5.1+5.2                         | Red                                   | Leaf          | 1                          | Red                                   | Support       | 2                          | 9.8          | Unknown       | 2               |
| 5.1+5.3                         | Red                                   | Leaf          | 1                          | Red                                   | Support       | 4                          | 9.15         | Unknown       | 2               |
| 5.1+5.3                         | Red                                   | Support       | 2                          | Red                                   | Leaf          | 1                          | 9.20         | Unknown       | 8               |
| 5.1+5.3                         | Red                                   | Support       | 2                          | Red                                   | Support       | 4                          | 9.32         | Unknown       | 2               |
| 5.1+5.3                         | Red                                   | Internal      | 2                          | Red                                   | Leaf          | 1                          | 9.34         | Unknown       | 4               |
| 5.1+5.3                         | Red                                   | Internal      | 2                          | Red                                   | Support       | 4                          | 9.45         | Unknown       | 1               |
| 5.1+5.3                         | Red                                   | Leaf          | 1                          | Red                                   | Leaf          | 1                          | 9.5          | Unknown       | 8               |
| 5.2+5.2                         | Red                                   | Leaf          | 1                          | Red                                   | Leaf          | 1                          | 9.12         | Unknown       | 4               |
| 5.2+5.2                         | Red                                   | Support       | 2                          | Red                                   | Leaf          | 1                          | 9.13         | Red           | 2               |
| 5.2+5.2                         | Red                                   | Support       | 3                          | Red                                   | Leaf          | 1                          | 9.22         | Unknown       | 2               |
| 5.2+5.2                         | Red                                   | Leaf          | 1                          | Red                                   | Support       | 2                          | 9.24         | Unknown       | 4               |
| 5.2+5.2                         | Red                                   | Leaf          | 1                          | Red                                   | Leaf          | 1                          | 9.3          | Unknown       | 1               |
| 5.2+5.2                         | Red                                   | Leaf          | 1                          | Red                                   | Support       | 3                          | 9.30         | Unknown       | 4               |
| 5.2+5.2                         | Red                                   | Support       | 2                          | Red                                   | Support       | 2                          | 9.35         | Unknown       | 1               |
| 5.2+5.2                         | Red                                   | Support       | 3                          | Red                                   | Support       | 2                          | 9.39         | Unknown       | 2               |
| 5.2+5.2                         | Red                                   | Support       | 3                          | Red                                   | Support       | 3                          | 9.45         | Unknown       | 1               |
| 5.2+5.2                         | Red                                   | Leaf          | 1                          | Red                                   | Leaf          | 1                          | 9.7          | Unknown       | 4               |
| 5.2+5.3                         | Red                                   | Leaf          | 1                          | Red                                   | Leaf          | 1                          | 9.16         | Unknown       | 8               |
| 5.2+5.3                         | Red                                   | Leaf          | 1                          | Red                                   | Support       | 4                          | 9.25         | Unknown       | 1               |
| 5.2+5.3                         | Red                                   | Support       | 2                          | Red                                   | Leaf          | 1                          | 9.28         | Unknown       | 4               |
| 5.2+5.3                         | Red                                   | Leaf          | 1                          | Red                                   | Support       | 4                          | 9.36         | Unknown       | 2               |
| 5.2+5.3                         | Red                                   | Support       | 3                          | Red                                   | Leaf          | 1                          | 9.37         | Unknown       | 4               |
| 5.2+5.3                         | Red                                   | Support       | 2                          | Red                                   | Support       | 4                          | 9.41         | Unknown       | 1               |
| 5.2+5.3                         | Red                                   | Support       | 3                          | Red                                   | Support       | 4                          | 9.46         | Unknown       | 1               |
| 5.2+5.3                         | Red                                   | Leaf          | 1                          | Red                                   | Leaf          | 1                          | 9.9          | Unknown       | 4               |
| 5.3+5.3                         | Red                                   | Leaf          | 1                          | Red                                   | Leaf          | 1                          | 9.23         | Unknown       | 16              |
| 5.3+5.3                         | Red                                   | Support       | 4                          | Red                                   | Leaf          | 1                          |              | Unknown       | 8               |
| 5.3+5.3                         | Red                                   | Support       | 4                          | Red                                   | Support       | 4                          | 9.47         | Unknown       | 1               |
